# Supplementary material for: Inherited human group IVA cytosolic phospholipase A2 deficiency abolishes platelet, endothelial, and leucocyte eicosanoid generation
Source: PubMed Central journal article supplement (PMC4608906; doi:10.1096/fj.15-275065), 2016-10-17
Supplement: supp_fj.15-275065_Supplemental_Figures.pdf [file supp_fj.15-275065_Supplemental_Figures.pdf]

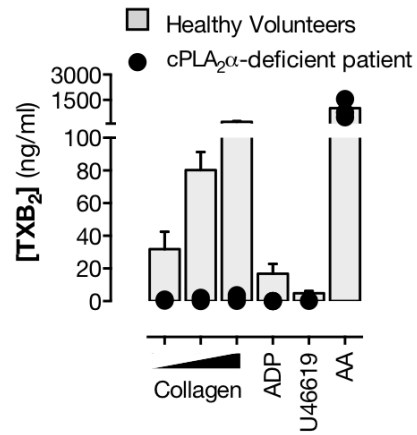

**Figure S1. Effect of cPLA<sub>2</sub> deficiency on platelet TXA<sub>2</sub> release to a range of agonists.** TXA<sub>2</sub> release (measured as TXB<sub>2</sub>) by platelet-rich plasma from healthy volunteer or cPLA<sub>2</sub>α-deficient patients (patient B + patient S) blood in response to stimulation by collagen (0.3-3 μg/ml), ADP (5 μmol/L), U46619 (10 μmol/L) or arachidonic acid (1mmol/L). n=4 (healthy volunteers), n=2 (patient).

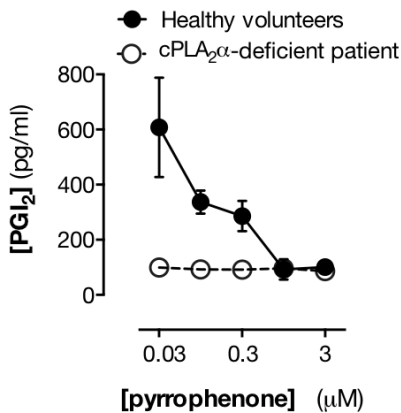

**Figure S2. Effect of cPLA<sub>2</sub> inhibition on prostacyclin release by endothelial cells.** Prostacyclin release (measured as 6-keto-PGF<sub>1α</sub>) by endothelial cells isolation from healthy volunteer or cPLA<sub>2</sub>α-deficient patient (patient S) blood in response to A23187 stimulation in the presence of increasing concentrations of the cPLA<sub>2</sub> inhibitor, pyrrophenone. n=4 (healthy volunteers), n=1 (patient).
