# Supplementary material for: Inherited human group IVA cytosolic phospholipase A2 deficiency abolishes platelet, endothelial, and leucocyte eicosanoid generation
Source: PubMed Central journal article supplement (PMC4608906; doi:10.1096/fj.15-275065), 2016-10-17
Supplement: supp_fj.15-275065_Supplemental_Table1.pdf [file supp_fj.15-275065_Supplemental_Table1.pdf]

| Mediator<br>(ng/ml)    | Vehicle (PBS) |                                  | Collagen (30µg/ml) |                                  | TRAP6 (30µM) |                                  | A23187 (50µM) |                                  |
|------------------------|---------------|----------------------------------|--------------------|----------------------------------|--------------|----------------------------------|---------------|----------------------------------|
|                        | Control       | cPLA <sub>2</sub> α<br>deficient | Control            | cPLA <sub>2</sub> α<br>deficient | Control      | cPLA <sub>2</sub> α<br>deficient | Control       | cPLA <sub>2</sub> α<br>deficient |
| 6ketoPGF <sub>1α</sub> | 0.0 ± 0.0     | 0.0                              | 0.1 ± 0.0          | 0.1                              | 0.1 ± 0.0    | 0.0                              | 0.2 ± 0.1     | 0.0                              |
| TXB <sub>2</sub>       | 0.1 ± 0.0     | 0.0                              | 17.6 ± 3.1         | 0.1                              | 24.1 ± 7.5   | 0.0                              | 38.4 ± 4.4    | 0.1                              |
| PGE <sub>2</sub>       | 0.0 ± 0.0     | 0.0                              | 1.1 ± 0.2          | 0.0                              | 2.0 ± 1.0    | 0.0                              | 4.8 ± 1.2     | 0.0                              |
| PGD <sub>2</sub>       | 0.0 ± 0.0     | 0.0                              | 0.8 ± 0.2          | 0.0                              | 1.1 ± 0.5    | 0.0                              | 2.7 ± 0.6     | 0.0                              |
| 8isoPGF <sub>2α</sub>  | 0.0 ± 0.0     | 0.0                              | 0.1 ± 0.0          | 0.0                              | 0.1 ± 0.0    | 0.0                              | 0.1 ± 0.0     | 0.0                              |
| 9,12,13-THOME          | 1.2 ± 0.9     | 0.2                              | 0.3 ± 0.1          | 0.2                              | 1.2 ± 1.0    | 0.2                              | 1.2 ± 0.9     | 0.2                              |
| 9,10,13-THOME          | 0.1 ± 0.0     | 0.1                              | 0.1 ± 0.0          | 0.1                              | 0.1 ± 0.0    | 0.0                              | 0.2 ± 0.0     | 0.0                              |
| 12,13-DHOME            | 13.8 ± 4.6    | 2.5                              | 15.0 ± 5.7         | 3.0                              | 15.8 ± 5.5   | 1.9                              | 17.3 ± 7.0    | 1.8                              |
| 9,10-DHOME             | 7.6 ± 2.4     | 2.4                              | 8.1 ± 2.7          | 2.7                              | 8.8 ± 3.1    | 1.7                              | 9.8 ± 3.2     | 1.2                              |
| 19,20-DiHDPA           | 0.9 ± 0.2     | 1.2                              | 0.9 ± 0.2          | 1.3                              | 1.0 ± 0.2    | 0.9                              | 0.9 ± 0.2     | 0.8                              |
| 14,15-DHET             | 0.5 ± 0.0     | 0.3                              | 0.5 ± 0.0          | 0.3                              | 0.5 ± 0.0    | 0.2                              | 0.5 ± 0.0     | 0.2                              |
| 11,12-DHET             | 0.3 ± 0.0     | 0.1                              | 0.3 ± 0.0          | 0.1                              | 0.3 ± 0.0    | 0.1                              | 0.3 ± 0.0     | 0.1                              |
| 8,9-DHET               | 0.1 ± 0.0     | 0.1                              | 0.1 ± 0.0          | 0.1                              | 0.2 ± 0.0    | 0.1                              | 0.2 ± 0.0     | 0.1                              |
| 5,6-DHET               | 0.1 ± 0.0     | 0.1                              | 0.1 ± 0.0          | 0.1                              | 0.1 ± 0.0    | 0.0                              | 0.2 ± 0.1     | 0.0                              |
| 13-HODE                | 1.8 ± 0.3     | 0.6                              | 2.0 ± 0.3          | 0.7                              | 2.0 ± 0.3    | 0.6                              | 3.4 ± 0.6     | 0.6                              |
| 9-HODE                 | 0.8 ± 0.1     | 0.2                              | 1.0 ± 0.1          | 0.2                              | 1.1 ± 0.2    | 0.1                              | 1.5 ± 0.1     | 0.1                              |
| 20-HETE                | 0.3 ± 0.1     | 0.1                              | 0.3 ± 0.1          | 0.0                              | 0.3 ± 0.1    | 0.1                              | 0.4 ± 0.1     | 0.0                              |
| 19-HETE                | 0.3 ± 0.0     | 0.2                              | 0.3 ± 0.0          | 0.2                              | 0.3 ± 0.0    | 0.1                              | 0.3 ± 0.0     | 0.1                              |
| 15-HETE                | 0.7 ± 0.1     | 0.5                              | 10.5 ± 2.2         | 0.6                              | 14.2 ± 4.9   | 0.4                              | 34.5 ± 2.5    | 0.7                              |
| 12-HETE                | 8 ± 5         | 2.8                              | 235 ± 64           | 6.0                              | 43 ± 19      | 2.9                              | 838 ± 90      | 25.7                             |
| 11-HETE                | 0.1 ± 0.0     | 0.1                              | 4.1 ± 0.8          | 0.1                              | 6.2 ± 2.4    | 0.0                              | 11.3 ± 1.3    | 0.1                              |
| 5-HETE                 | 0.7 ± 0.2     | 0.4                              | 1.3 ± 0.3          | 0.5                              | 1.2 ± 0.2    | 0.3                              | 217 ± 39      | 0.3                              |
| 12,13-EpOME            | 2.9 ± 0.6     | 0.8                              | 2.6 ± 0.4          | 0.8                              | 2.8 ± 0.5    | 0.8                              | 2.8 ± 0.5     | 1.0                              |
| 9,10-EpOME             | 0.3 ± 0.1     | 0.2                              | 0.3 ± 0.0          | 0.2                              | 0.3 ± 0.1    | 0.2                              | 0.4 ± 0.1     | 0.3                              |
| 19,20-EpDPE            | 0.4 ± 0.1     | 0.8                              | 0.5 ± 0.1          | 1.0                              | 0.5 ± 0.1    | 0.8                              | 0.6 ± 0.1     | 0.7                              |
| 17,18-EpETE            | 0.0 ± 0.0     | 0.0                              | 0.0 ± 0.0          | 0.0                              | 0.0 ± 0.0    | 0.0                              | 0.0 ± 0.0     | 0.0                              |
| 14,15-EET              | 0.1 ± 0.0     | 0.0                              | 0.1 ± 0.0          | 0.1                              | 0.1 ± 0.0    | 0.0                              | 0.4 ± 0.0     | 0.1                              |
| 11,12-EET              | 0.0 ± 0.0     | 0.0                              | 0.0 ± 0.0          | 0.0                              | 0.0 ± 0.0    | 0.0                              | 0.2 ± 0.0     | 0.0                              |
| 8,9-EET                | 0.1 ± 0.0     | 0.0                              | 0.1 ± 0.0          | 0.1                              | 0.1 ± 0.0    | 0.0                              | 0.2 ± 0.0     | 0.0                              |
| 5,6-EET                | 0.4 ± 0.1     | 0.2                              | 0.6 ± 0.1          | 0.3                              | 0.7 ± 0.1    | 0.2                              | 2.4 ± 0.1     | 0.4                              |

**Table S1. Contribution of cPLA<sub>2</sub>α to eicosanoid synthesis in whole blood stimulated with platelet activators.** Total eicosanoid levels in whole blood from healthy volunteers (‘control’) or from patient S lacking cPLA<sub>2</sub>α (‘cPLA<sub>2</sub>α deficient’) stimulated with vehicle (PBS), collagen (30µg/ml), TRAP-6 amide (30µM) or Ca<sup>2+</sup> ionophore A23187 (30µM). n=4 (healthy volunteers), n=1 (patient).
