# Supplementary material for: Inherited human group IVA cytosolic phospholipase A2 deficiency abolishes platelet, endothelial, and leucocyte eicosanoid generation
Source: PubMed Central journal article supplement (PMC4608906; doi:10.1096/fj.15-275065), 2016-10-17
Supplement: supp_fj.15-275065_Supplemental_Table2.pdf [file supp_fj.15-275065_Supplemental_Table2.pdf]

| Mediator<br>(ng/ml)            | Vehicle (PBS)  |                                      | AA (1mM)           |                                      |
|--------------------------------|----------------|--------------------------------------|--------------------|--------------------------------------|
|                                | Control        | cPLA <sub>2</sub> $\alpha$ deficient | Control            | cPLA <sub>2</sub> $\alpha$ deficient |
| 6ketoPGF <sub>1</sub> $\alpha$ | 0.0 $\pm$ 0.0  | 0.0                                  | 2.5 $\pm$ 0.6      | 0.5                                  |
| TXB <sub>2</sub>               | 0.1 $\pm$ 0.0  | 0.0                                  | 168.0 $\pm$ 12.1   | 83.3                                 |
| PGE <sub>2</sub>               | 0.0 $\pm$ 0.0  | 0.0                                  | 144.7 $\pm$ 38.8   | 30.1                                 |
| PGD <sub>2</sub>               | 0.0 $\pm$ 0.0  | 0.0                                  | 143.1 $\pm$ 46.5   | 35.0                                 |
| 8isoPGF <sub>2</sub> $\alpha$  | 0.0 $\pm$ 0.0  | 0.0                                  | 14.3 $\pm$ 5.9     | 0.8                                  |
| 9,12,13-THOME                  | 1.2 $\pm$ 0.9  | 0.2                                  | 1.4 $\pm$ 0.5      | 0.2                                  |
| 9,10,13-THOME                  | 0.1 $\pm$ 0.0  | 0.1                                  | 0.9 $\pm$ 0.4      | 0.1                                  |
| 12,13-DHOME                    | 13.8 $\pm$ 4.6 | 2.5                                  | 18.0 $\pm$ 2.9     | 2.4                                  |
| 9,10-DHOME                     | 7.6 $\pm$ 2.4  | 2.4                                  | 17.2 $\pm$ 7.2     | 2.2                                  |
| 19,20-DiHDPA                   | 0.9 $\pm$ 0.2  | 1.2                                  | 1.0 $\pm$ 0.1      | 1.1                                  |
| 14,15-DHET                     | 0.5 $\pm$ 0.0  | 0.3                                  | 23.8 $\pm$ 6.0     | 6.7                                  |
| 11,12-DHET                     | 0.3 $\pm$ 0.0  | 0.1                                  | 14.1 $\pm$ 2.9     | 6.4                                  |
| 8,9-DHET                       | 0.1 $\pm$ 0.0  | 0.1                                  | 8.0 $\pm$ 2.7      | 2.1                                  |
| 5,6-DHET                       | 0.1 $\pm$ 0.0  | 0.1                                  | 41.9 $\pm$ 16.7    | 11.6                                 |
| 13-HODE                        | 1.8 $\pm$ 0.3  | 0.6                                  | 13.3 $\pm$ 5.3     | 0.7                                  |
| 9-HODE                         | 0.8 $\pm$ 0.1  | 0.2                                  | 12.4 $\pm$ 5.6     | 0.4                                  |
| 20-HETE                        | 0.3 $\pm$ 0.1  | 0.1                                  | 6.3 $\pm$ 0.4      | 5.1                                  |
| 19-HETE                        | 0.3 $\pm$ 0.0  | 0.2                                  | 9.6 $\pm$ 3.8      | 1.7                                  |
| 15-HETE                        | 0.7 $\pm$ 0.1  | 0.5                                  | 1945.3 $\pm$ 484.6 | 813.3                                |
| 12-HETE                        | 8.5 $\pm$ 5.1  | 2.8                                  | 1448.3 $\pm$ 228.7 | 1060.0                               |
| 11-HETE                        | 0.1 $\pm$ 0.0  | 0.1                                  | 301.1 $\pm$ 83.3   | 129.3                                |
| 5-HETE                         | 0.7 $\pm$ 0.2  | 0.4                                  | 520.0 $\pm$ 148.3  | 298.7                                |
| 12,13-EpOME                    | 2.9 $\pm$ 0.6  | 0.8                                  | 4.1 $\pm$ 0.8      | 0.7                                  |
| 9,10-EpOME                     | 0.3 $\pm$ 0.1  | 0.2                                  | 1.2 $\pm$ 0.5      | 0.2                                  |
| 19,20-EpDPE                    | 0.4 $\pm$ 0.1  | 0.8                                  | 1.1 $\pm$ 0.5      | 1.0                                  |
| 17,18-EpETE                    | 0.0 $\pm$ 0.0  | 0.0                                  | 0.2 $\pm$ 0.1      | 0.1                                  |
| 14,15-EET                      | 0.1 $\pm$ 0.0  | 0.0                                  | 149.8 $\pm$ 36.8   | 66.3                                 |
| 11,12-EET                      | 0.0 $\pm$ 0.0  | 0.0                                  | 113.5 $\pm$ 34.9   | 38.7                                 |
| 8,9-EET                        | 0.1 $\pm$ 0.0  | 0.0                                  | 115.9 $\pm$ 42.2   | 40.9                                 |
| 5,6-EET                        | 0.4 $\pm$ 0.1  | 0.2                                  | 471.8 $\pm$ 201.7  | 200.3                                |

**Table S2. Contribution of cPLA<sub>2</sub> $\alpha$  to eicosanoid synthesis in whole blood stimulated with exogenous arachidonic acid (AA).** Total eicosanoid levels in whole blood from healthy volunteers ('control') or from patient S, lacking cPLA<sub>2</sub> $\alpha$  ('cPLA<sub>2</sub> $\alpha$  deficient') stimulated with vehicle (PBS) or exogenous AA (1mM). n=4 (healthy volunteers), n=1 (patient).
