# Supplementary material for: Inherited human group IVA cytosolic phospholipase A2 deficiency abolishes platelet, endothelial, and leucocyte eicosanoid generation
Source: PubMed Central journal article supplement (PMC4608906; doi:10.1096/fj.15-275065), 2016-10-17
Supplement: supp_fj.15-275065_Supplemental_Table3.pdf [file supp_fj.15-275065_Supplemental_Table3.pdf]

| Mediator<br>(ng/ml)    | Vehicle (DMEM) |                                  | LPS (10µg/ml) |                                  | LPS + AA (1mM) |                                  |
|------------------------|----------------|----------------------------------|---------------|----------------------------------|----------------|----------------------------------|
|                        | Control        | cPLA <sub>2</sub> α<br>deficient | Control       | cPLA <sub>2</sub> α<br>deficient | Control        | cPLA <sub>2</sub> α<br>deficient |
| 6ketoPGF <sub>1α</sub> | 0.0 ± 0.0      | 0.0                              | 0.0 ± 0.0     | 0.0                              | 0.3 ± 0.0      | 0.1                              |
| TXB <sub>2</sub>       | 0.6 ± 0.3      | 0.0                              | 2.5 ± 0.4     | 0.3                              | 128.1 ± 12.9   | 35.2                             |
| PGE <sub>2</sub>       | 5.7 ± 5.3      | 0.1                              | 26.2 ± 6.7    | 2.0                              | 161.6 ± 25.3   | 55.4                             |
| PGD <sub>2</sub>       | 0.1 ± 0.0      | 0.0                              | 0.2 ± 0.1     | 0.1                              | 140.9 ± 5.2    | 105.1                            |
| 8isoPGF <sub>2α</sub>  | 0.0 ± 0.0      | 0.0                              | 0.2 ± 0.0     | 0.0                              | 2.7 ± 0.2      | 1.4                              |
| 9,12,13-THOME          | 0.7 ± 0.5      | 0.2                              | 0.7 ± 0.4     | 0.3                              | 0.7 ± 0.4      | 0.3                              |
| 9,10,13-THOME          | 0.0 ± 0.0      | 0.0                              | 0.0 ± 0.0     | 0.0                              | 0.1 ± 0.0      | 0.1                              |
| 12,13-DHOME            | 21.8 ± 5.6     | 3.0                              | 19.6 ± 3.8    | 3.9                              | 12.0 ± 6.3     | 3.6                              |
| 9,10-DHOME             | 9.6 ± 3.2      | 2.5                              | 8.5 ± 3.0     | 3.6                              | 5.1 ± 3.0      | 0.9                              |
| 19,20-DiHDPA           | 2.2 ± 0.5      | 2.9                              | 2.1 ± 0.2     | 2.8                              | 1.4 ± 0.6      | 1.9                              |
| 14,15-DHET             | 0.7 ± 0.1      | 0.6                              | 0.8 ± 0.1     | 0.5                              | 8.9 ± 6.2      | 5.7                              |
| 11,12-DHET             | 1.1 ± 0.1      | 0.5                              | 0.8 ± 0.1     | 0.7                              | 7.7 ± 5.2      | 6.2                              |
| 8,9-DHET               | 1.2 ± 0.1      | 0.9                              | 1.3 ± 0.1     | 0.6                              | 7.4 ± 3.3      | 5.1                              |
| 5,6-DHET               | 1.3 ± 0.2      | 0.5                              | 1.3 ± 0.1     | 0.8                              | 50.1 ± 23.9    | 23.9                             |
| 13-HODE                | 16.8 ± 3.8     | 7.3                              | 30.9 ± 9.7    | 20.7                             | 12.8 ± 4.3     | 19.0                             |
| 9-HODE                 | 4.9 ± 1.1      | 1.6                              | 5.3 ± 1.5     | 4.1                              | 3.8 ± 1.6      | 0.5                              |
| 20-HETE                | 0.8 ± 0.4      | 0.0                              | 0.6 ± 0.2     | 0.0                              | 9.9 ± 3.9      | 9.6                              |
| 19-HETE                | 0.5 ± 0.3      | 0.0                              | 0.8 ± 0.4     | 1.2                              | 18.1 ± 6.3     | 18.8                             |
| 15-HETE                | 11.9 ± 4.7     | 5.9                              | 34.8 ± 8.6    | 12.5                             | 2787 ± 1116    | 3386.7                           |
| 12-HETE                | 215.0 ± 50.2   | 71.5                             | 229.2 ± 70.6  | 98.1                             | 1758 ± 1029    | 2082.0                           |
| 11-HETE                | 3.6 ± 2.1      | 0.7                              | 8.8 ± 4.2     | 2.5                              | 400 ± 213.9    | 595.3                            |
| 5-HETE                 | 4.5 ± 2.0      | 2.3                              | 4.8 ± 1.0     | 2.4                              | 797.1 ± 359.8  | 1045.3                           |
| 12,13-EpOME            | 2.8 ± 0.5      | 1.7                              | 2.7 ± 0.7     | 1.9                              | 1.8 ± 0.5      | 1.8                              |
| 9,10-EpOME             | 0.6 ± 0.1      | 0.5                              | 0.6 ± 0.2     | 0.6                              | 0.4 ± 0.1      | 0.6                              |
| 19,20-EpDPE            | 1.3 ± 0.2      | 4.4                              | 1.6 ± 0.2     | 4.8                              | 1.4 ± 0.5      | 5.2                              |
| 17,18-EpETE            | 0.0 ± 0.0      | 0.0                              | 0.0 ± 0.0     | 0.0                              | 0.0 ± 0.0      | 0.0                              |
| 14,15-EET              | 0.0 ± 0.0      | 0.0                              | 0.0 ± 0.0     | 0.0                              | 63.3 ± 18.1    | 61.0                             |
| 11,12-EET              | 0.0 ± 0.0      | 0.0                              | 0.0 ± 0.0     | 0.0                              | 25.8 ± 9.1     | 33.9                             |
| 8,9-EET                | 0.0 ± 0.0      | 0.0                              | 0.0 ± 0.0     | 0.0                              | 32.2 ± 11.6    | 40.3                             |
| 5,6-EET                | 0.3 ± 0.3      | 0.0                              | 0.5 ± 0.3     | 0.0                              | 119.1 ± 36.6   | 125.8                            |

**Table S3. Contribution of cPLA<sub>2</sub>α to eicosanoid synthesis in whole blood stimulated with LPS.** Total eicosanoid levels in whole blood from healthy volunteers ('control') or from patient S lacking cPLA<sub>2</sub>α ('cPLA<sub>2</sub>α deficient') stimulated for 18 hours with vehicle (DMEM) or LPS (10µg/ml) with or without addition of exogenous arachidonic acid (AA; 1mM) for the final 30 mins. n=4 (healthy volunteers), n=1 (patient).
